# Supplementary material
Source: bioRxiv or medRxiv preprint supplement (https://www.biorxiv.org/highwire/filestream/47906/field_highwire_adjunct_files/1/128579-2.pdf)
Supplement: Supplementary file [file 128579-2.pdf]

# Lineage: Visualizing Multivariate Clinical Data in Genealogy Graphs

## Supplementary Material

**Carolina Nobre**

[cnobre@sci.utah.edu](mailto:cnobre@sci.utah.edu)

University of Utah

**Nils Gehlenborg**

[nils@hms.harvard.edu](mailto:nils@hms.harvard.edu)

Harvard Medical School

**Hilary Coon**

[hilary.coon@utah.edu](mailto:hilary.coon@utah.edu)

University of Utah

**Alexander Lex**

[alex@sci.utah.edu](mailto:alex@sci.utah.edu)

University of Utah

## Scalability Demonstrations

Here we compare Lineage to Progeny, the tool currently used by our collaborators. Progeny is a commercial genealogy drawing tool that closely follows the standard for visualizing genealogies. For details, visit <http://www.progenygenetics.com/>. Figures S1 and S2 show the same dataset visualized with Progeny (Figure S1) and Lineage (Figure S2). Progeny shows three attributes, while Lineage shows 15.

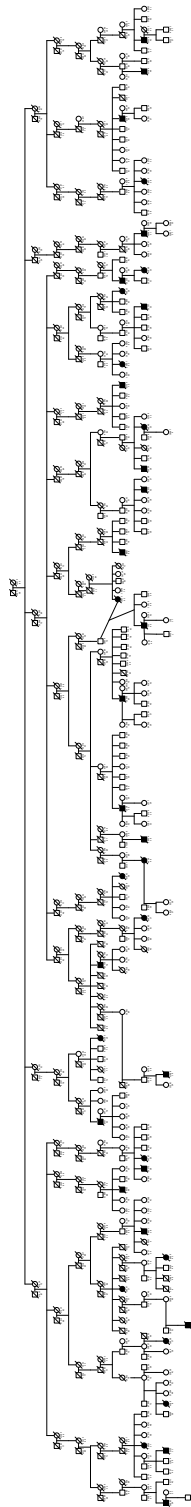

**Figure S1:** Screenshot of Progeny, the tool previously used by our collaborators. This figure shows a family with 404 members and three attributes.

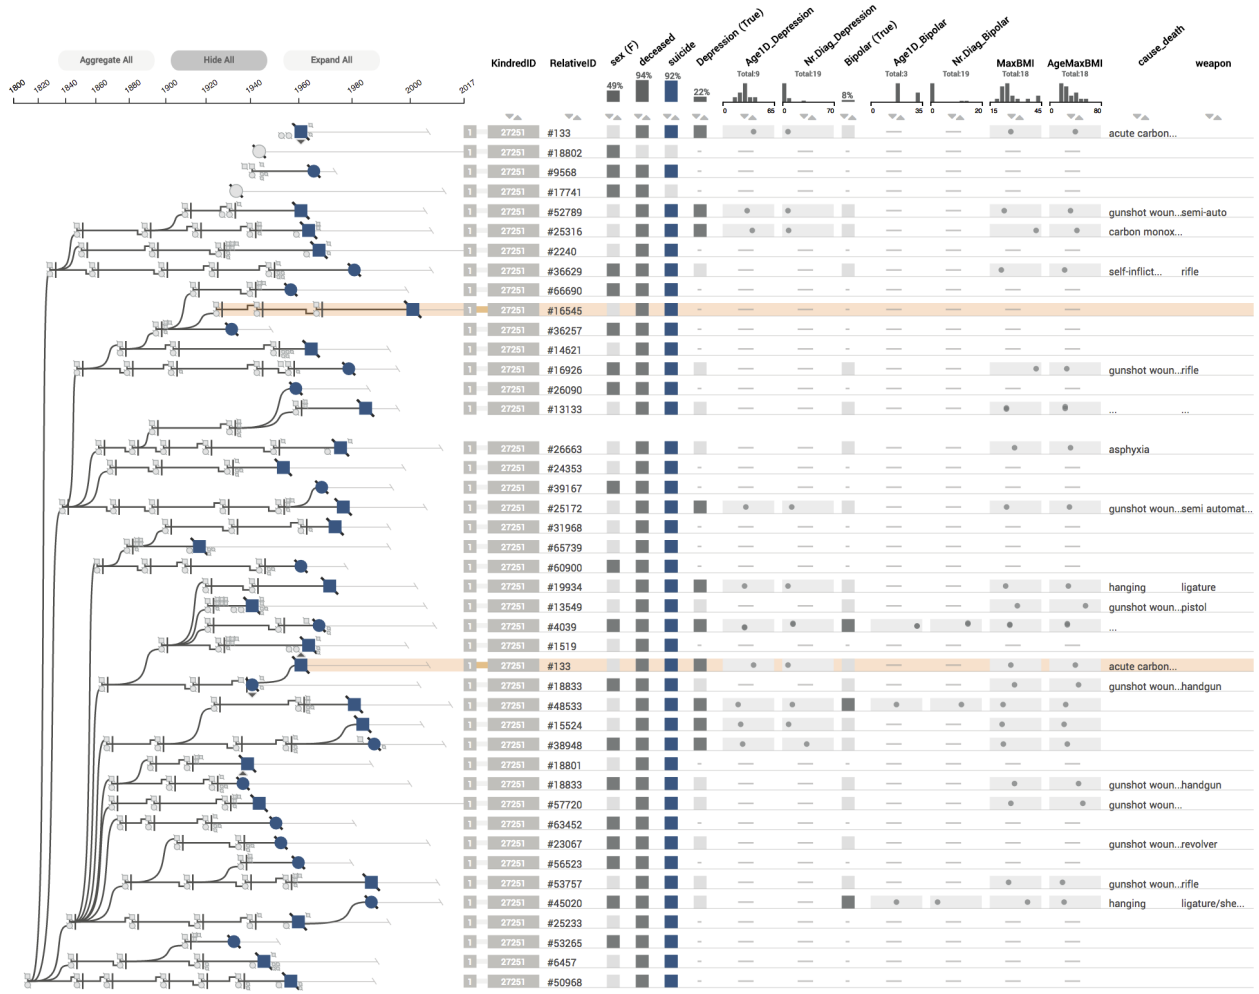

**Figure S2:** The same family as shown in S1 in Lineage. The 404 family members conveniently fit on a single screen on a 2560x1600 pixel display while 15 different attributes are shown in the table.
